# Supplementary material
Source: ML conference proceedings conference paper supplement (https://openaccess.thecvf.com/content/WACV2025/html/Serych_MFTIQ_Multi-Flow_Tracker_WACV_2025_paper.html)
Supplement: Supplementary file 1 [file Serych_MFTIQ_Multi-Flow_Tracker_WACV_2025_supplemental.pdf]

# MFTIQ: Multi-Flow Tracker with Independent Matching Quality Estimation

## Supplementary Materials

### A. Image Feature Extraction

For the DINOv2 features we use the author-provided ViT-S/14-reg network checkpoint. The ResNet50 [21] network, pre-trained on the ImageNet1K [9] dataset, is used to extract features from its first three blocks: the input block, residual block 1, and residual block 2. Each output feature is up-sampled to  $\frac{H}{4} \times \frac{W}{4}$  and compressed to 32 channels using a convolutional layer.

The custom image features CNN is trained from scratch, and it is inspired by NEUFLOW’s feature CNN [63]. Initially, an image pyramid is created by subsampling the input image at different scales (1/1, 1/2, 1/4). For each level of the image pyramid, a convolutional layer is applied with specific kernel sizes, strides, and padding to ensure the output resolution is  $\frac{H}{4} \times \frac{W}{4}$  (k4:s4:p0 | k8:s2:p3 | k7:s1:p3). The outputs from each pyramid level are concatenated and compressed to 32 channels using an additional convolutional layer.

The features from all the feature providers (DINOv2, RESNET, custom CNN) are aggregated and compressed through a convolutional operation (from  $5 \times 32$  channels down to 32 channels) to produce an additional *fused feature* for the cost-volume.

The impact of feature extractors on performance is demonstrated in Tab. 6. Excluding DINOv2 features causes a decrease in AJ from 65.7 to 64.6. Further removing both DINOv2 and RESNET features, leaving only the custom shallow CNN features, results in a more pronounced drop to AJ 61.5. Since the overall runtime is dominated

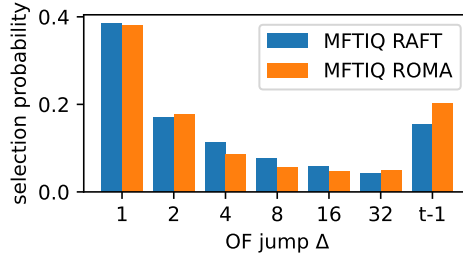

Figure 5. Probability of selecting OF with a given  $\Delta$  on TAP-VID DAVIS [10], evaluated on frames more than 32 frames distant from template. Statistics are similar for RAFT and ROMA, but long jumps  $\Delta = t - 1$  are selected more often with ROMA.

by optical flow computation, it remains nearly unchanged ( $\approx -0.01$  FPS) without the DINO and the RESNET backbones. Thus, we keep all three feature extractors.

### B. Feature Concatenation and Flow Features

The final featuremap contains 6 (DINO,  $3 \times$  RESNET, custom CNN, *fused*) cost-volumes, each flattened to 49 channels from the  $\pm 3$  range  $7 \times 7$  cost-volume response maps, resulting in a total of 294 channels. In addition to that it contains  $2 \times 32$  channels of the *fused features* from the template and the current frame (warped by the flow). Finally it has 64 channels of flow features derived from the input  $F_{1 \rightarrow t}$  flow chain by a small CNN, for a grand total of 422 channels.

### C. Timing

As mentioned in Section 3.3, we implement caching for optical flow estimates and image features to improve efficiency. Table 5 reports the overall tracking timing for results shown in Tab. 1 and Tab. 2 in the paper both with standard caching during computation and with the caches

| MFTIQ with     | FPS $\uparrow$ |          | PPS $\uparrow$ |          | FPS pre-computed $\uparrow$ |          | PPS pre-computed $\uparrow$ |          |
|----------------|----------------|----------|----------------|----------|-----------------------------|----------|-----------------------------|----------|
|                | 512×512        | 720×1080 | 512×512        | 720×1080 | 512×512                     | 720×1080 | 512×512                     | 720×1080 |
| RAFT [51]      | 2.66           | 0.90     | 8234           | 8897     | 10.95                       | 3.76     | 26944                       | 33921    |
| NEUFLOWV2 [62] | 5.67           | 2.03     | 16446          | 19348    | 10.56                       | 3.59     | 27589                       | 32175    |
| RAPIDFLOW [36] | 3.06           | 1.35     | 9603           | 13058    | 10.65                       | 3.49     | 28396                       | 31960    |
| GMFLOW [58]    | 3.63           | 0.76     | 11365          | 7638     | 10.31                       | 3.47     | 27304                       | 32075    |
| SEA-RAFT [55]  | 2.93           | 0.93     | 9285           | 9195     | 10.24                       | 3.40     | 27296                       | 31591    |
| MEMFLOW [13]   | 1.16           | 0.29     | 3836           | 2985     | 10.95                       | 3.71     | 27412                       | 32907    |
| FFORMER++ [48] | 1.04           | 0.24     | 3457           | 2437     | 10.47                       | 3.76     | 27183                       | 33303    |
| ROMA [16]      | 0.21           | 0.19     | 709            | 1948     | 10.10                       | 3.67     | 24986                       | 32703    |

Table 5. **Runtime evaluation** of the whole MFTIQ tracker with various OF methods with (*right*) and without (*left*) OF and features pre-computed. All results shows processing speed in frames-per-second (FPS) and points-per-second (PPS) for two different resolutions of images. PPS were evaluated for a sequence of 80 images. In the case of pre-computed optical flow and image feature cache, speed is the same regardless of the OF method used up to a measurement noise.

| method                | AJ $\uparrow$ | $\langle \delta_{avg}^x \rangle \uparrow$ | OA $\uparrow$ |
|-----------------------|---------------|-------------------------------------------|---------------|
| (1) Full MFTIQ (ROMA) | 65.67         | 79.82                                     | 87.75         |
| (2) -DINO             | 64.61         | 79.59                                     | 87.80         |
| (3) -DINO -RESNET     | 61.54         | 78.58                                     | 85.02         |

Table 6. Influence of IQ feature extractors in the MFTIQ model. The table shows the performance variations when different backbones are omitted, with the remainder of the network held constant. All models followed identical training and evaluation protocols. The evaluation was conducted using the TAP-VID DAVIS [10] (strided) dataset.

| $\Delta$ -set hyper-parameter              | AJ $\uparrow$ | $\langle \delta_{avg}^x \rangle \uparrow$ | OA $\uparrow$ | runtime [FPS] $\downarrow$ |          |
|--------------------------------------------|---------------|-------------------------------------------|---------------|----------------------------|----------|
|                                            |               |                                           |               | 512x512                    | 720x1080 |
| $\Delta \in \{1, 2, 4, 8, 16, 32, t - 1\}$ | 65.67         | 79.82                                     | 87.75         | 0.21                       | 0.19     |
| $\Delta \in \{1, 4, 16, t - 1\}$           | 65.50         | 79.57                                     | 87.42         | 0.35                       | 0.32     |
| $\Delta \in \{1, 8, 32, t - 1\}$           | 59.03         | 72.79                                     | 82.34         | 0.35                       | 0.32     |
| $\Delta \in \{t - 1\}$                     | 57.46         | 70.08                                     | 78.73         | 1.31                       | 1.14     |
| $\Delta \in \{1\}$                         | 54.67         | 70.99                                     | 73.35         | 1.31                       | 1.14     |

Table 7. Ablation of different sets of  $\Delta$  used for optical flow chaining. The default set of  $\Delta$ s (*first row*) (same as in MFT) performs the best. The base-4 (*second row*) set achieves a better speed / performance trade-off. MFTIQ ROMA evaluated on TAP-VID DAVIS [10] (strided). Performance measured by average Jaccard (AJ), position accuracy ( $\langle \delta_{avg}^x \rangle$ ), and occlusion accuracy (OA). Speed of tracking densely measured by average frames per second (FPS).

pre-computed offline. With optical flow and image features computed in advance, MFTIQ runs at 3.7 FPS on  $720 \times 1080$  and at over 10 FPS on  $512 \times 512$  video resolution.

## D. Delta Set Ablation

Tab. 7 shows the effect of using different sets of  $\Delta$ s. Our default base-2 configuration,  $\Delta \in \{1, 2, 4, 8, 16, 32, t - 1\}$ , follows the MFT setup [39]. However, we found that using a base-4 set,  $\Delta \in \{1, 4, 16, t - 1\}$ , achieves a  $1.6\times$  speedup with only a minimal performance decrease on the TAP-VID DAVIS dataset [10]. Both direct matching between the template and the current frame ( $\Delta \in \{t - 1\}$ ) and consecutive frame chaining ( $\Delta \in \{1\}$ ) result in a significant performance decrease across all evaluated metrics.

We have also evaluated (Fig. 5) the frequency of selection for each  $\Delta$  in MFTIQ RAFT and MFTIQ ROMA in the default  $\Delta$ -set. The results show similar statistics between the two OFs, though the direct jump ( $\Delta = t - 1$ ) is selected more frequently in ROMA. This is expected since the ROMA was trained on wide-baseline matching data, making it more reliable with more distant pairs of frames. Only frames beyond timestep 32 are evaluated to avoid biasing the results with smaller  $\Delta$ s at the beginning of the sequence, where longer  $\Delta$ s are not yet available for matching.
